# Supplementary material
Source: Springer Nature journal article supplement (https://www.springermedizin.de/resource/supplementary/13054_2010_9332_MOESM1_ESM.pdf/9705946)
Supplement: MOESM1 [file 9705946]

Primary admission, age $\geq$ 16, ISS $\geq$ 16, massive transfusion, >10pRBC  
n=1250

Without TBI (AIS head $<$ 3)  
n=638

With TBI (AIS head $\geq$ 3)  
n=612

FFP:pRBC $\leq$ 1:2  
n=212

FFP:pRBC $>$ 1:2  
n=426

FFP:pRBC $\leq$ 1:2  
n=167

FFP:pRBC $>$ 1:2  
n=445
